# Supplementary material
Source: publisher site journal article supplement (https://www.dovepress.com/get_supplementary_file.php?f=477494.docx)

**Supplementary Material**

Table S1 The significantly different bacteria from the phylum level down to the genus level based on Metastas analysis

| Taxonomy | Mean (OB_DM) | Mean (OB_NGT) | P value |
| --- | --- | --- | --- |
| Actinobacteria | 0.009560469 | 0.004543065 | 0.045 |
| Bacteroidetes | 0.566735214 | 0.671322004 | 0.015 |
| Firmicutes | 0.293593033 | 0.220734462 | 0.036 |
| Actinobacteria | 0.007069225 | 0.002911937 | 0.049 |
| Bacteroidia | 0.566735214 | 0.671322004 | 0.016 |
| Aeromonadales | 0.00055471 | 0.008592474 | 0.0000128 |
| Bacteroidales | 0.566726169 | 0.670907772 | 0.005 |
| Bacteroidaceae | 0.39313637 | 0.269880145 | 0.017 |
| Lachnospiraceae | 0.161593533 | 0.097875198 | 0.002 |
| Prevotellaceae | 0.145984551 | 0.377217322 | 0.004 |
| Succinivibrionaceae | 0.000538964 | 0.00856212 | 0.0000128 |
| Bacteroides | 0.39313637 | 0.269880145 | 0.018 |
| Blautia | 0.018333209 | 0.005135725 | 0.007 |
| Catenibacterium | 0.00012747 | 0.002180129 | 0.017 |
| Escherichia-Shigella | 0.039897923 | 0.011614358 | 0.044 |
| Lachnoclostridium | 0.015102437 | 0.009536669 | 0.043 |
| Prevotella_9 | 0.12443567 | 0.332264858 | 0.006 |
| Roseburia | 0.024908285 | 0.01484821 | 0.031 |
| Ruminococcaceae_UCG-014 | 0.004493464 | 0.000714066 | 0.015 |
| Ruminococcus_gnavus_group | 0.009313646 | 0.002729222 | 0.007 |
| Succinivibrio | 0.000509218 | 0.008509002 | 0.0000128 |
| Sutterella | 0.013727368 | 0.026909039 | 0.029 |

Figure S1 Alpha diversity estimated by the Chao1, Shannon and Simpson index. (a) Alpha diversity estimated by the Chao1 index; (b) Alpha diversity estimated by the Shannon index; (c) Alpha diversity estimated by the Simpson index.


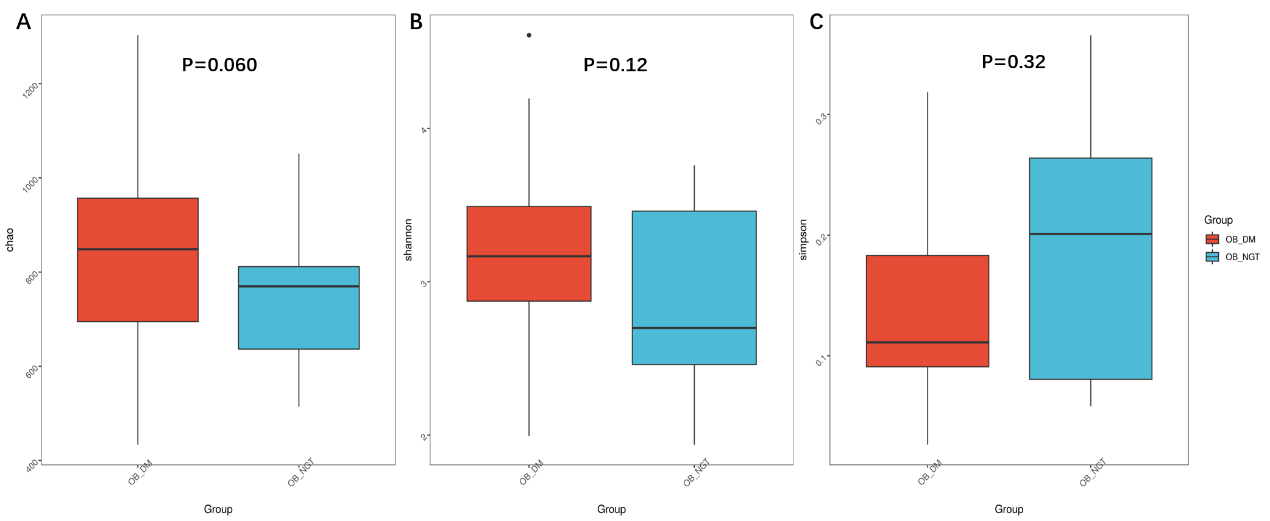

Supplement: Supplementary file 1 [file get_supplementary_file.php]
